# Supplementary material
Source: PubMed Central journal article supplement (PMC6283072)

Corr of Rep Measurements Across ad.01a and ad.01b

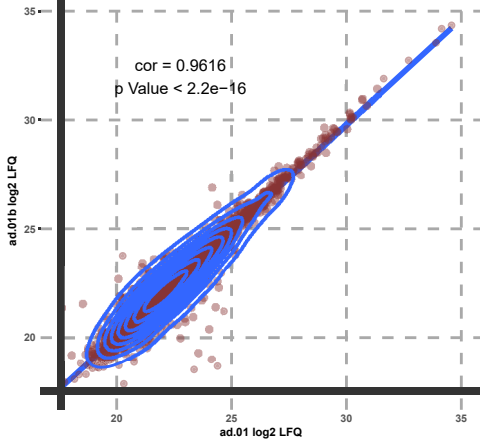

Corr of Rep Measurements Across ad.02a and ad.02b

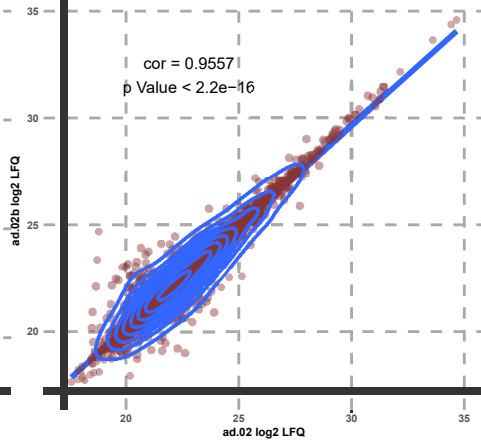

Corr of Rep Measurements Across ad.05a and ad.05b

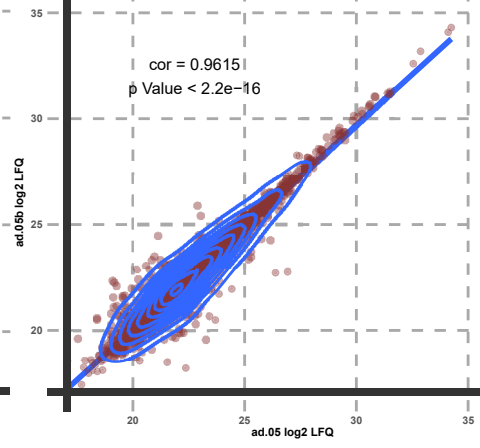

Corr of Rep Measurements Across ad.06a and ad.06b

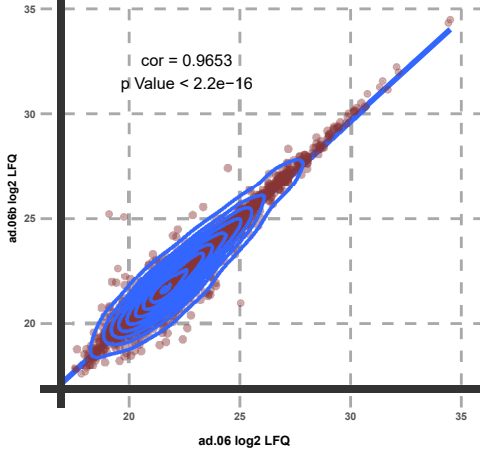

Corr of Rep Measurements Across ad.07a and ad.07b

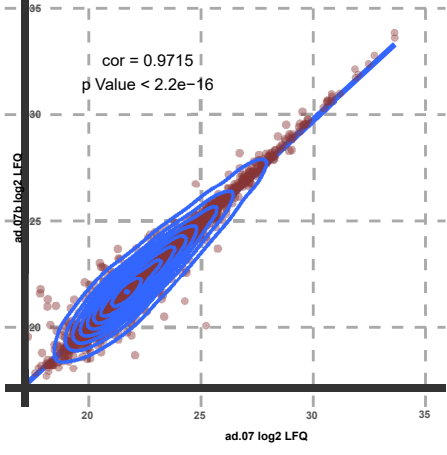

Corr of Rep Measurements Across ctl.08a and ctl.08b

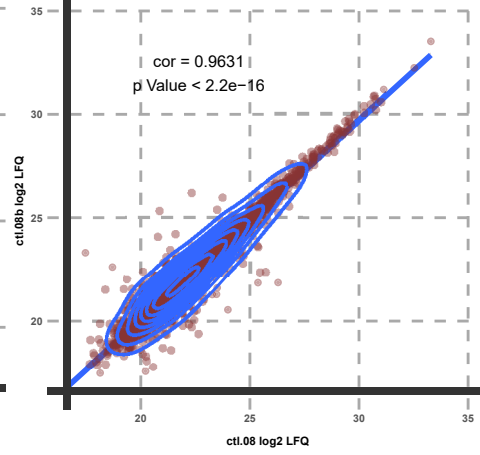

Corr of Rep Measurements Across ctl.09a and ctl.09b

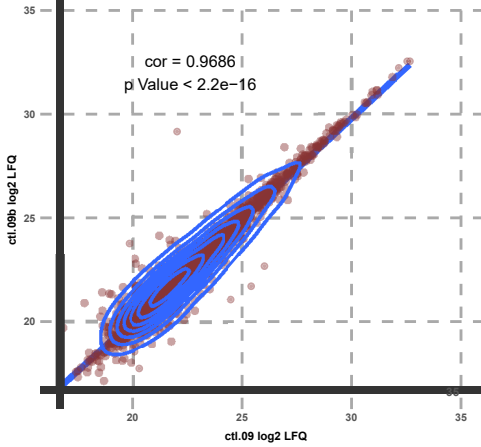

Corr of Rep Measurements Across ctl.13a and ctl.13b

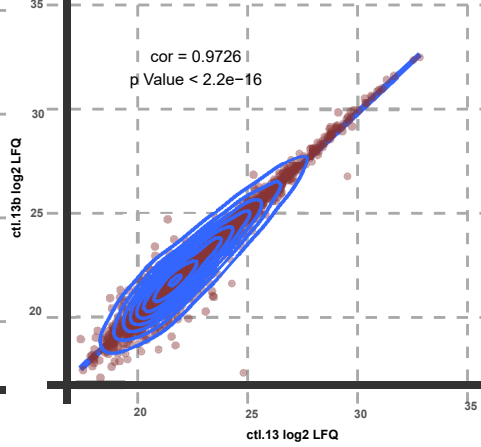

Corr of Rep Measurements Across ctl.14a and ctl.14b

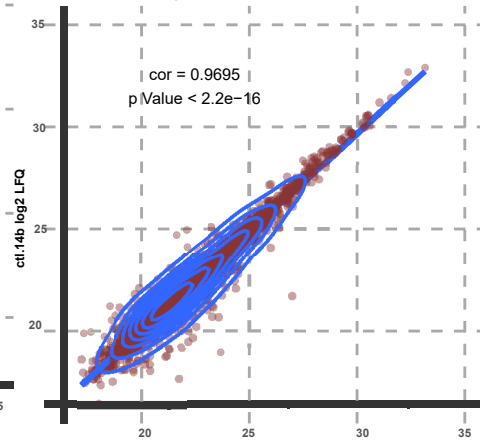

Corr of Rep Measurements Across ctl.11a and ctl.11b

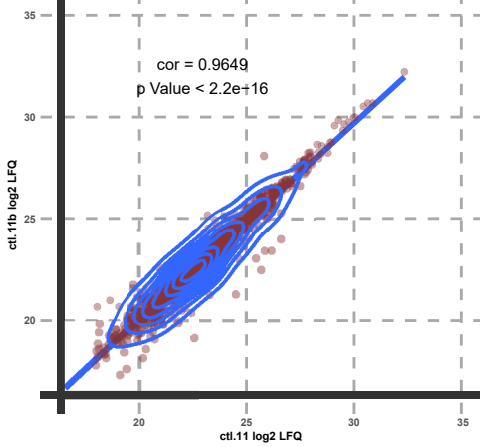

Supplement: NIHMS994967-supplement-Figure_S2.pdf [file NIHMS994967-supplement-Figure_S2.pdf]
