# Supplementary material
Source: PubMed Central journal article supplement (PMC6283072)

# Brain differential ubiquitylome

## GO terms for 667 increased Ub sites

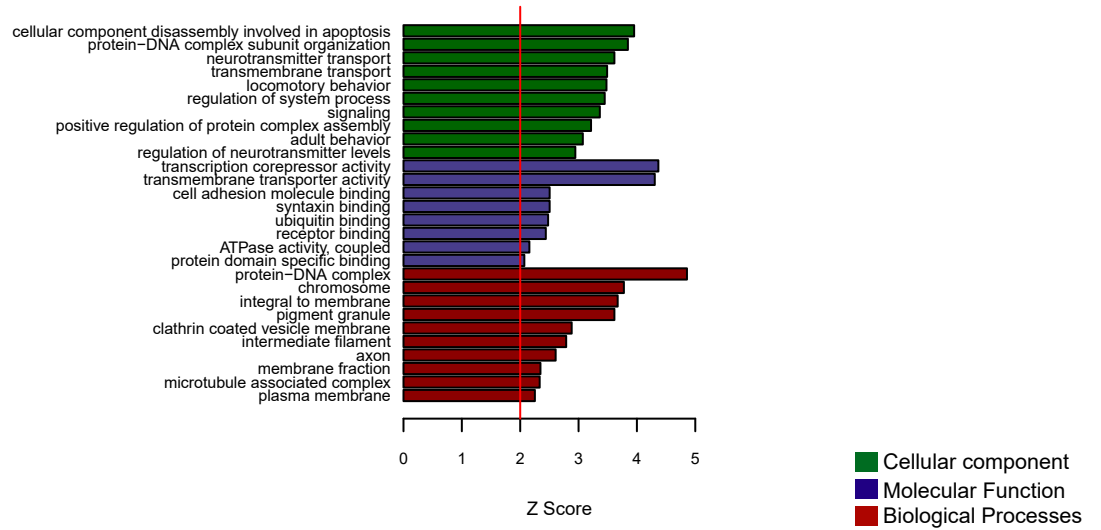

## GO terms for 167 decreased Ub sites

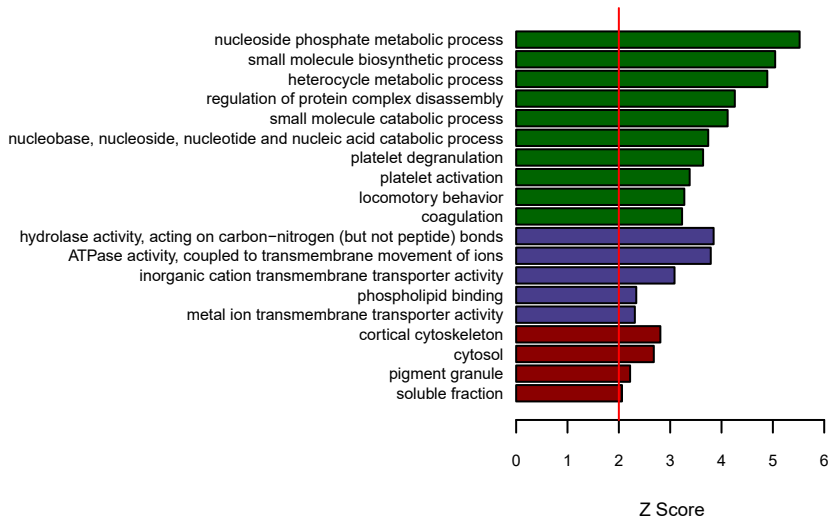

Supplement: NIHMS994967-supplement-Figure_S3.pdf [file NIHMS994967-supplement-Figure_S3.pdf]
