# Supplementary material
Source: PubMed Central journal article supplement (PMC6283072)

# Total Proteome GO Terms

## AD Increased (362)

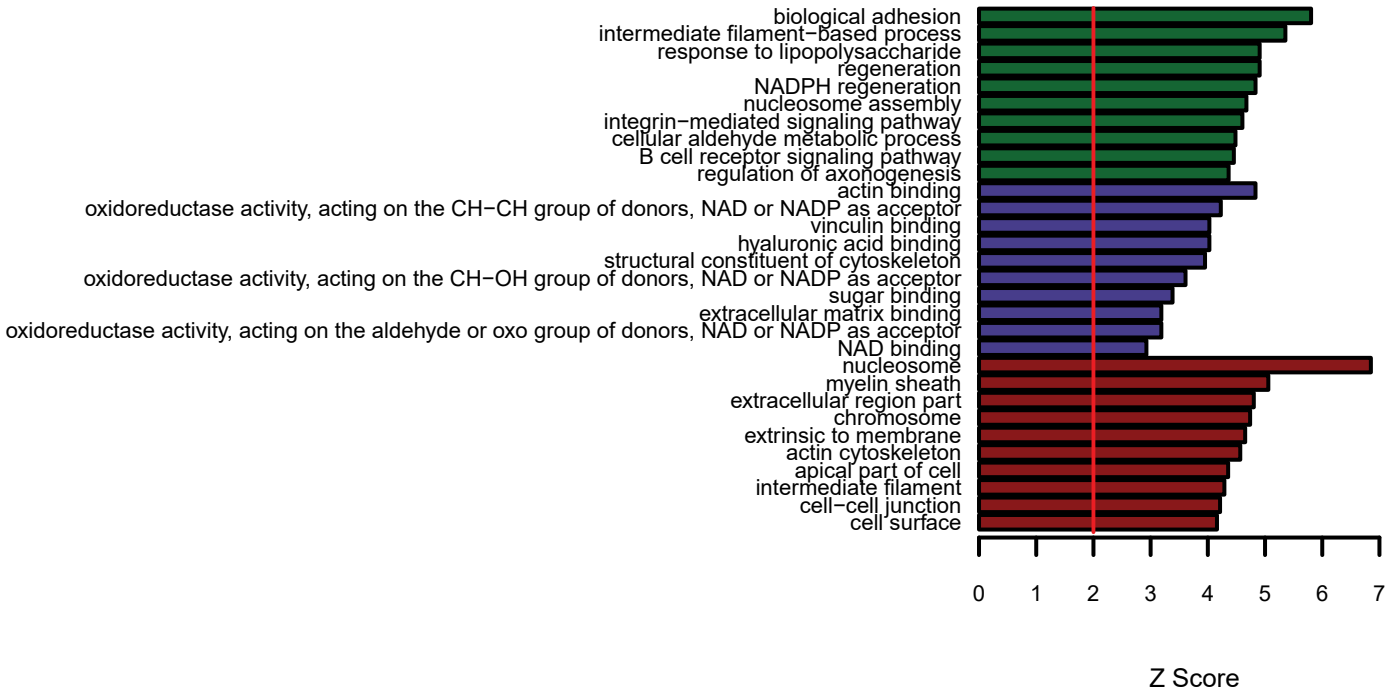

## AD decreased (229)

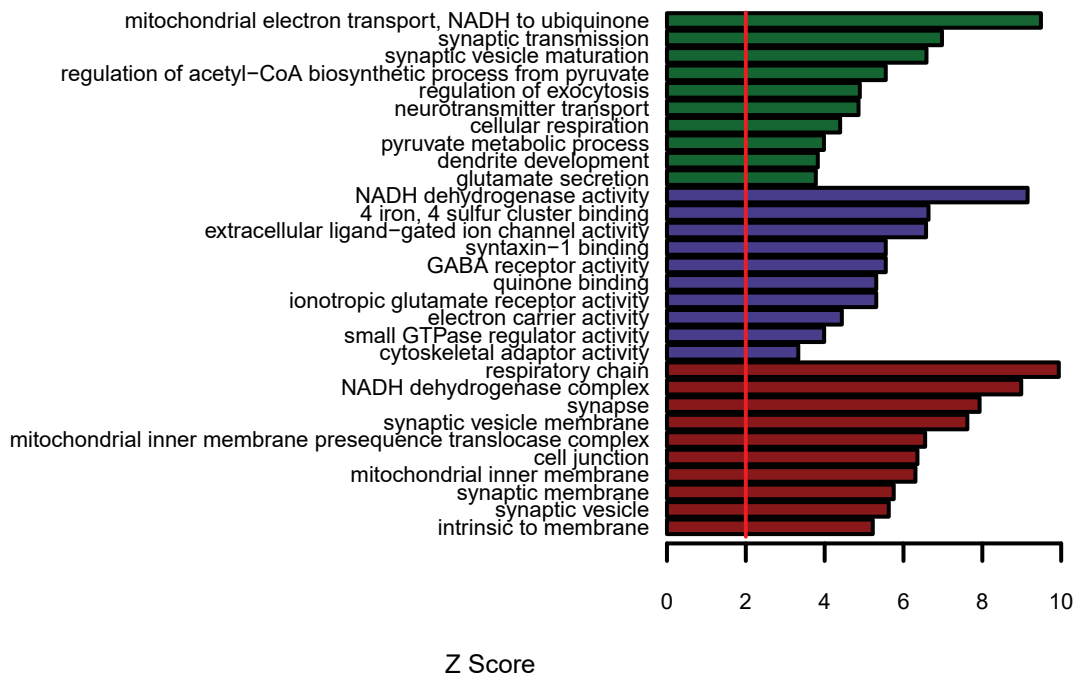

Supplement: NIHMS994967-supplement-Figure_S1.pdf [file NIHMS994967-supplement-Figure_S1.pdf]
